# Supplementary material for: Field Implementation of a Monthly Multi-Modal Prophylactic Strategy (Dinotefuran-Permethrin-Pyriproxyfen and Milbemycine Oxime-Praziquantel) Against Canine Vector-Borne Diseases in Corsica
Source: Preprints.org preprint supplement (doi:10.20944/preprints202007.0156.v1), 2020-07-08
Supplement: Supplementary file 1 [file supplementary]

**Table 2.** Infection status of dogs in terms of CVBDs-causing pathogens or groups of pathogens [i.e., canine vector-borne diseases (CVBDs) and mosquito-borne diseases (MBDs)] detected by serology or qPCR in dogs at Day 0, 6- and 12-months of the follow-up.

| **Experimental units** |  | **Code** | **Sex** | **Age**  **(year)** | *Wolbachia* of *D. immitis* | | | *D. immitis* DNA | | | Heartworm infection | | | *D. repens DNA* | | | *“MBDs”*  *Dirofilariosis* | | | *E. canis Ab.* | | | *L. infantum Ab.* | | | *CVBDs* | | |
| --- | --- | --- | --- | --- | --- | --- | --- | --- | --- | --- | --- | --- | --- | --- | --- | --- | --- | --- | --- | --- | --- | --- | --- | --- | --- | --- | --- | --- |
|  | D 0 | D 6 MM | D 12 MM | D 0 | D 6 MM | D 12 MM | D 0 | D 6 MM | D 12 MM | D 0 | D 6 MM | D 12 MM | D 0 | D 6 MM | D 12 MM | D 0 | D 6 MM | D 12 MM | D 0 | D 6 MM | D 12 MM | D 0 | D 6 MM | D 12 MM |
| **Group-1 “MMP” (N=25**) | | | | | | | | | | | | | | | |  |  |  |  |  |  |  |  |  |  |  |  |  |
|  |  | MMP 66 | M | 2 | - | - | - | - | - | - | - | - | - | - | - | - | - | - | - | Pos. | Pos. | Pos. | - | - | - | - | - | - |
| Samples having undergo a change |  | MMP 80 | M | 5 | - | - | - | - | - | - | - | - | - | - | - | - | - | - | - | Pos. | Pos. | Pos. | - | - | - | - | - | - |
|  | MMP 84 | M | 6 | - | - | - | - | - | - | - | - | - | - | - | - | - | - | - | Pos. | - | - | - | - | - | - | - | - |
|  | MMP 96 | M | 4 | - | - | - | - | - | - | - | - | - | - | - | - | - | - | - | Pos. | Pos. | Pos. | - | - | - | - | - | - |
|  | MMP 98 | F | 8 | - | - | - | - | - | - | - | - | - | - | - | - | - | - | - | Pos. | Pos. | Pos. | - | - | - | - | - | - |
|  | Total | |  |  | 0 | 0 | 0 | 0 | 0 | 0 | 0 | 0 | 0 |  |  | 0 | 0 | 0 | 0 | 5 | 5 | 4 | 0 | 0 | 0 | 0 | 0 | 0 |
|  | New cases/6 months | |  |  |  | 0 | 0 |  | 0 | 0 |  | 0 | 0 |  | 0 | 0 |  | 0 | 0 |  | 0 | 0 |  | 0 | 0 |  | 0 | 0 |
|  | Total new cases | |  |  | 0 | | | 0 | | | 0 | | | 0 | | | 0 | | | 0 | | | 0 | | | 0 | | |
| **Group-1 “IP” (N=55)** | | |  |  |  |  |  |  |  |  |  |  |  |  |  |  |  |  |  |  |  |  |  |  |  |  |  |  |
| Samples having undergo a change |  | RLP 1 | M | 5 | - | - | - | - | - | - | - | - | - | - | - | Pos. | - | - | Pos. | - | - | - | - | - | - | - | - | Pos. |
|  | RLP 8 |  |  | - | - | - | - | - | - | - | - | - | - | - | - | - | - | - | Pos. | Pos. | Pos. | - | - | - | Pos. | Pos. | Pos. |
| RLP 15 |  |  | - | - | - | - | - | - | - | - | - | - | - | - | - | - | - | Pos. | Pos. | - | - | - | - | Pos. | Pos. | - |
|  | RLP 19 |  |  | - | - | - | - | - | - | - | - | - | - | - | - | - | - | - | Pos. | Pos. | Pos. | - | - | - | Pos. | Pos. | Pos. |
|  | RLP 31* | M | 6 | - | - | - | - | - | - | - | - | - | - | - | - | - | - | - | Pos. | - | - | Pos. | Pos. | Pos. | Pos. | Pos. | Pos. |
|  | RLP 44 | M | 2 | - | - | Pos. | - | - | Pos. | - | - | Pos. | - | - | - | - | - | Pos. | - | - | - | Pos. | - | - | Pos. | - | Pos. |
|  | RLP 58 | F | 2 | - | - | Pos. | - | - | - | - | - | Pos. | - | - | - | - | - | Pos. | - | - | - | - | - | - | - | - | Pos. |
|  | RLP 59 | M | 2 | - | - | Pos. | - | - | - | - | - | Pos. | - | - | - | - | - | Pos. | - | - | - | - | - | - | - | - | Pos. |
|  | RLP 73 | M | 10 | - | - | - | - | - | - | - | - | - | - | - | - | - | - | - | - | - | Pos. | - | - | - | - | - | Pos. |
|  | RLP 90 | F | 3 | - | - | - | - | - | - | - | - | - | - | - | - | - | - | - | - | Pos. | Pos. | - | - | - | - | Pos. | Pos. |
|  | RLP 91 | F | 6 | - | - | Pos. | - | - | - | - | - | Pos. | - | - | - | - | - | Pos. | - | - | - | - | - | - | - | - | Pos. |
|  | RLP 92 | M | 2 | - | - | Pos. | - | - | - | - | - | Pos. | - | - | - | - | - | Pos. | - | - | - | Pos. | Pos. | - | Pos. | Pos. | Pos. |
|  | RLP 93 | M | 3 | Pos. | - | Pos. | Pos. | Pos. | Pos. | Pos. | Pos. | Pos. | - | - | - | Pos. | Pos. | Pos. | - | - | - | - | - | - | Pos. | Pos. | Pos. |
|  | RLP 94 | M | 9 | Pos. | - | Pos. | Pos. | - | Pos. | Pos. | - | Pos. | - | - | - | Pos. | - | Pos. | - | - | - | - | - | - | Pos. | - | Pos. |
|  | RLP 95 | M | 6 | - | - | Pos. | - | - | - | - | - | Pos. | - | - | - | - | - | Pos. | - | - | - | Pos. | Pos. | Pos. | Pos. | Pos. | Pos. |
|  | RLP 103* | M | 5 | - | Pos. | - | Pos. | Pos. | - | Pos. | Pos. | - | - | - | - | Pos. | Pos. | - | - | Pos. | Pos. | - | - | - | Pos. | Pos. | Pos. |
|  | RLP 107 | F | 2 | - | - | Pos. | - | - | - | - | - | Pos. | - | - | - | - | - | Pos. | - | - | - | Pos. | Pos. | - | Pos. | Pos. | Pos. |
|  | RLP 108 | F | 6 | Pos. | Pos. | - | - | - | Pos. | Pos. | Pos. | Pos. | - | - | - | Pos. | Pos. | Pos. | - | - | - | - | - | - | Pos. | Pos. | Pos. |
|  | Total | |  |  | 3 | 2 | 9 | 3 | 2 | 4 | 4 | 3 | 10 | 0 | 0 | 1 | 4 | 3 | 11 | 4 | 5 | 5 | 5 | 3 | 2 | 12 | 11 | 17 |
|  | New cases/6 months | |  |  |  | 1 | 9 |  | 0 | 3 |  | 0 | 8 |  | 0 | 1 |  | 0 | 9 |  | 2 | 1 |  | 0 | 1 |  | 2 | 9 |
|  | Total of new cases/pathogens | |  |  | 10 | | | 3 | | | 8 | | | 1 | | | 9 | | | 3 | | | 0 | | | 11 | | |

* Samples positive for at least 2 CVBDs, which considered only one time in the calculation of grouped CVBDs.

**MMP:** monthly multi-modal prophylactic strategy

**RLP:** real-life prophylactic treatment
